# Supplementary material
Source: PubMed Central journal article supplement (PMC5824730)
Supplement: NIHMS936357-supplement-4.pdf [file NIHMS936357-supplement-4.pdf]

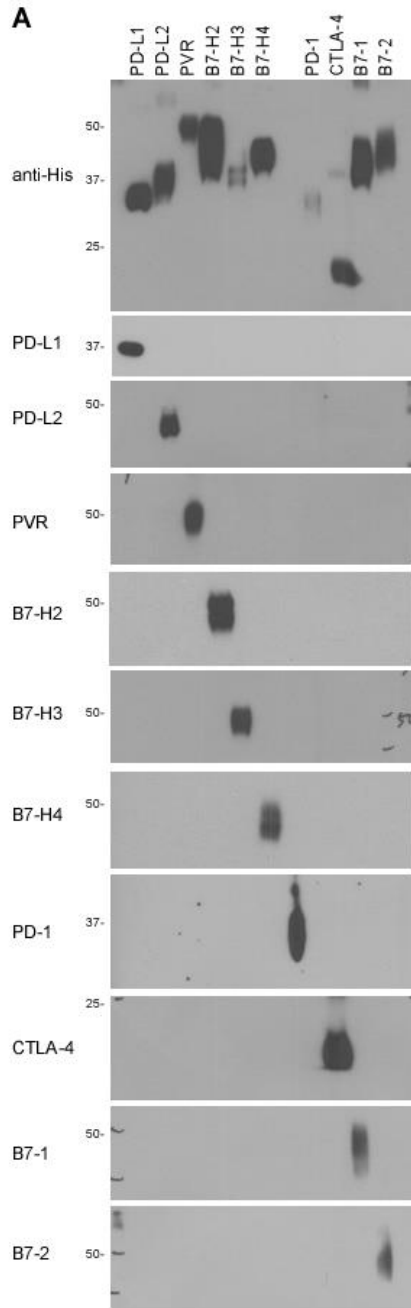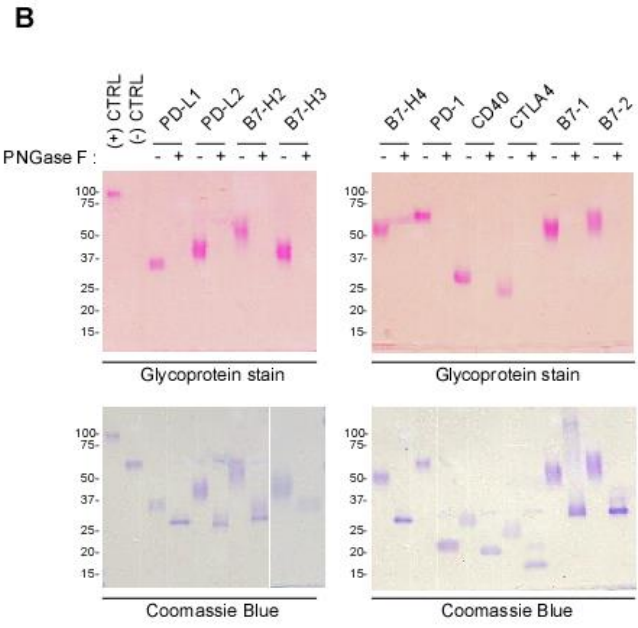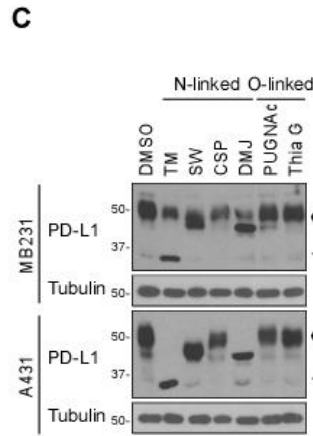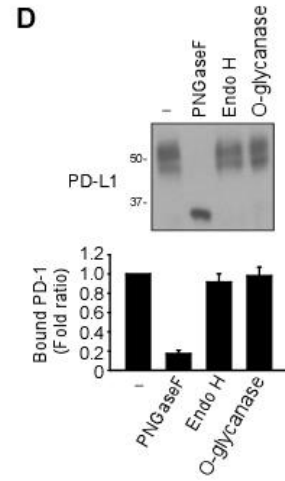

**Figure S1. Glycosylation of inhibitory immune receptor is required for interaction with its ligand, Related to Figure 1.** (A) Western blot analysis of the indicated proteins shown in Figure 1 with commercially available antibodies. (B) Glycoprotein staining of purified His-tagged proteins with or without PNGase F treatment (top). Coomassie blue staining panel represents total amount of His-tagged proteins (bottom). Control (-), a control for non-glycoprotein; Control (+), a control for glycoprotein. CTRL, control. (C) Western blot analysis of PD-L1 in MDA-MB-231 and A431 cells with the absence or presence of N-linked or O-linked inhibitors. (D) N-linked glycosylation is required for PD-L1 and PD-1 interaction. Purified PD-L1 was treated with PNGaseF, Endonuclease H, or O-glyconase prior to the PD-1 binding assay. All error bars are expressed as mean  $\pm$  S.D. of 3 independent experiments.

**A**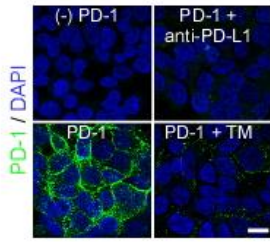**B**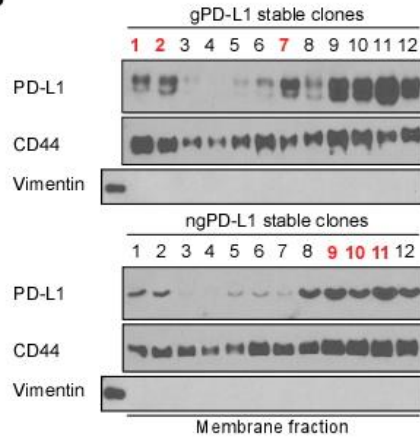**C**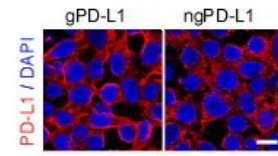**D**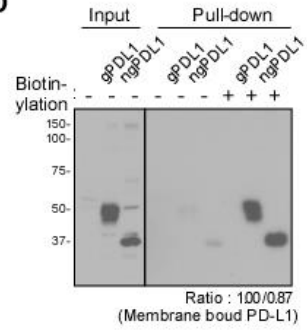**E**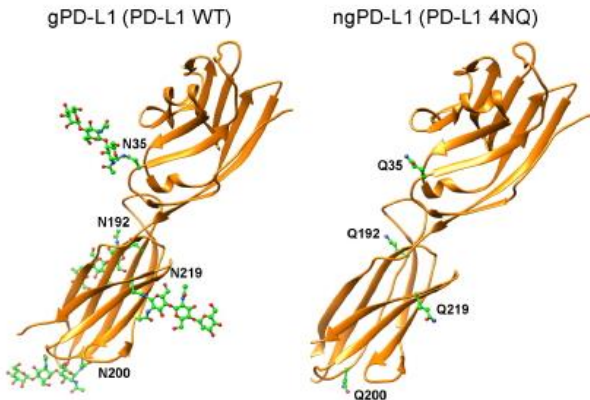**F**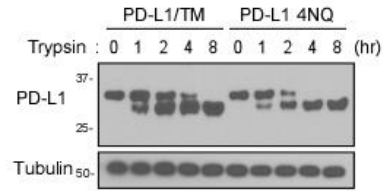**G**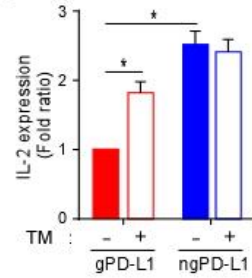**H**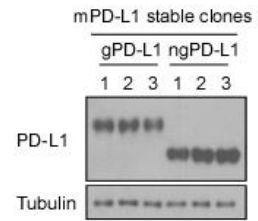

**Figure S2. Glycosylation of PD-L1 is required for interaction with PD-1, Related to Figure 2.** (A) Interaction of PD-1 and PD-L1 proteins with or without TM or anti-PD-L1 antibody treatment. Confocal image shows bound PD-1/Fc fusion protein on membrane of gPD-L1 expressing BT549 cells. Cells were pretreated with MG132 prior to experiment. (B) Western blot analysis of PD-L1 in gPD-L1 or ngPD-L1 expressing BT549 clones. Red colored clones were used for PD-1 binding assay in Figure 2D. CD44 served as a marker of membrane fraction. Vimentin serves as a marker of cytoplasmic fraction. (C) Confocal image shows membrane localized gPD-L1 or ngPD-L1 proteins. (D) Membrane localization of gPD-L1 or ngPD-L1 proteins in BT549 cells. After biotinylation of membrane localization of gPD-L1 or ngPD-L1 proteins, the biotinylated proteins were pull-downed by streptavidin agarose. Membrane localized PD-L1 proteins were examined by Western blot. The ratio of membrane bound PD-L1 proteins was quantified by a densitometer (bottom). (E) Predicted structure of PD-L1 protein. Ribbon diagram of the PD-L1 and PD-1 complex. PD-L1 and PD-1 are shown in orange and blue, respectively. N-linked oligosaccharides are shown as sticks. Four glycosylation sites (N35, N192, N200 and N219) are shown as indicated. (F) Conformational changes of PD-L1 WT and 4NQ. Tunicamycin treated non-glycosylated PD-L1 WT (PD-L1/TM) and PD-L1 4NQ were treated with 10 nM trypsin and analyzed by Western blot. (G) Levels of soluble IL-2 in co-culture of Jurkat T cells and PD-L1 expressing BT549 cells. (H) Western blot analysis of PD-L1 in mouse gPD-L1 or ngPD-L1 expressing 4T1 clones. mPD-L1, mouse PD-L1. \*p <0.05, statistically significant by Student's *t*-test. All error bars are expressed as mean  $\pm$  S.D. of 3 independent experiments.

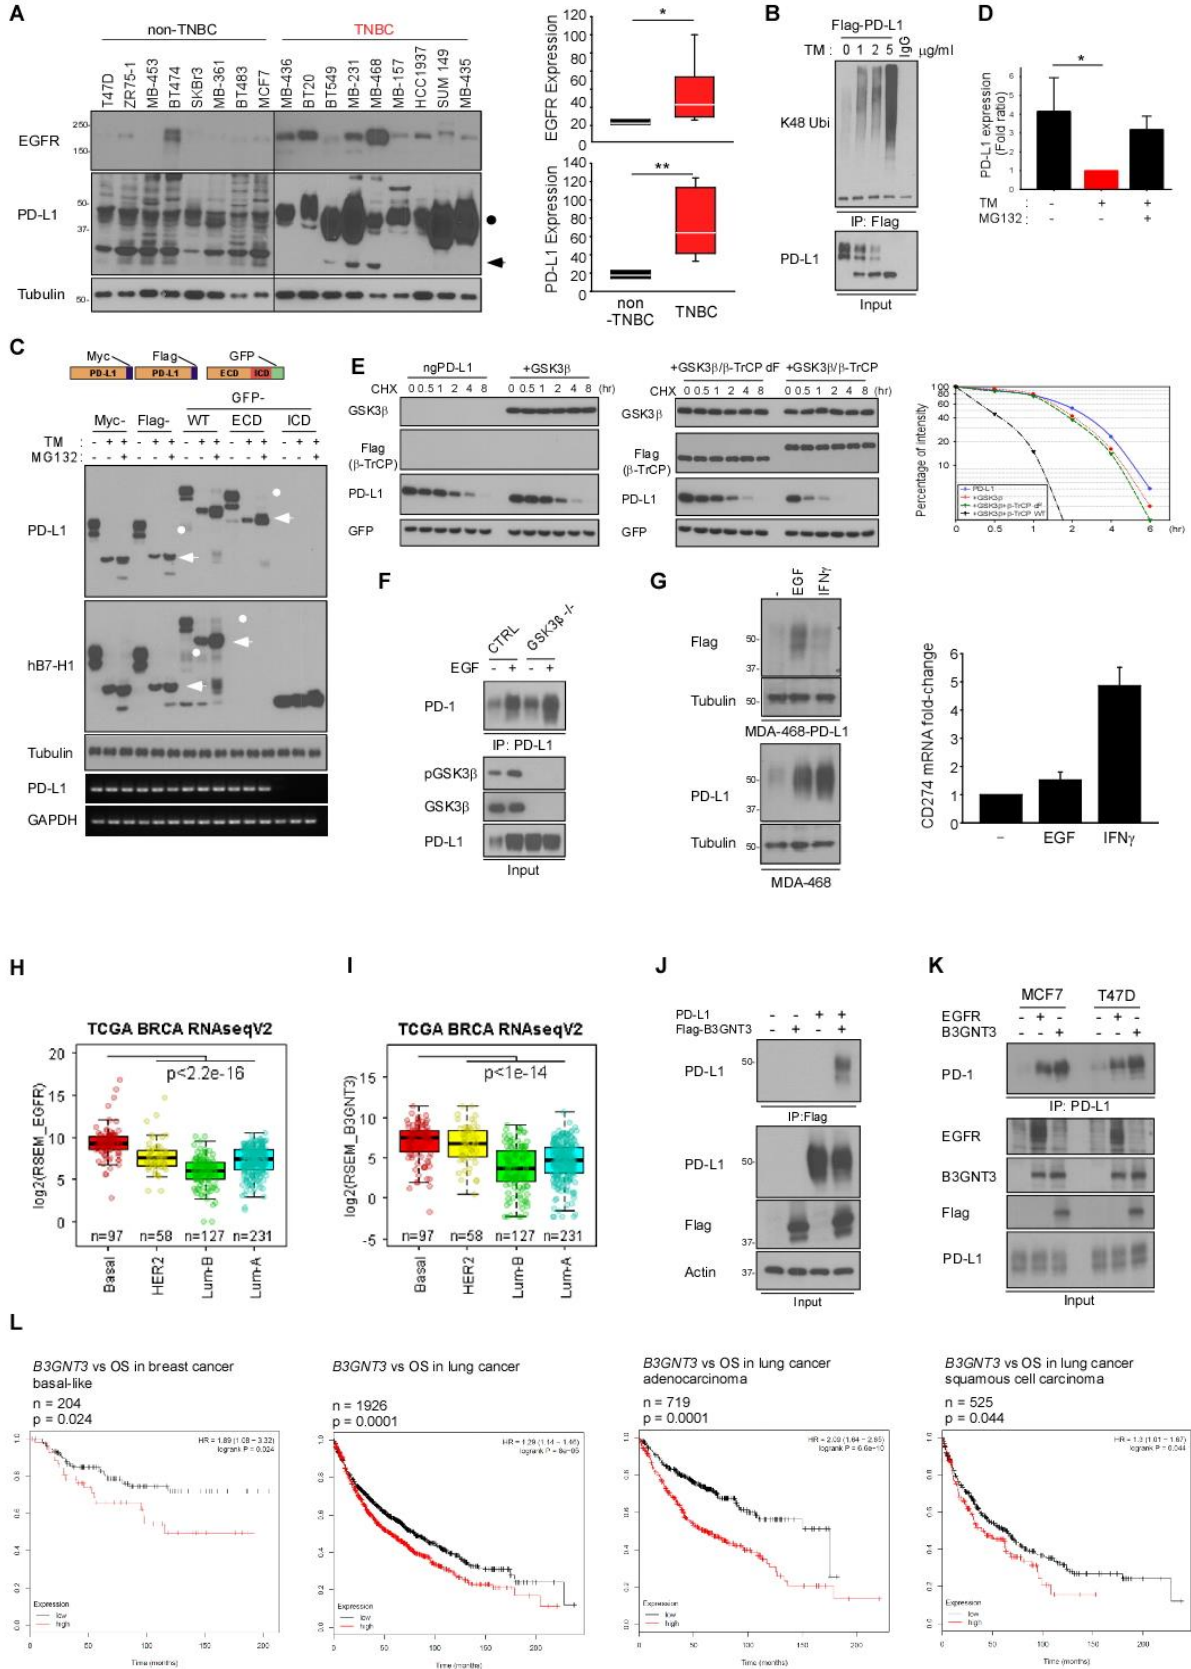

**Figure S3. EGF signaling upregulates N-glycosyltransferase B3GNT3 in BLBC, Related to Figure 3.** (A) Western blot analysis of EGFR and PD-L1 expression in a panel of non-triple negative and triple negative breast cancer cell lines. Quantification of EGFR and glycosylated PD-L1 are shown on the right. (B) Ubiquitination assay of PD-L1 in response to treatment with TM. HEK293 cells were transiently transfected with indicated constructs. Ubiquitinated PD-L1 was immunoprecipitated (IP) and subjected to Western blot analysis with the anti-ubiquitin K48 antibody. (C) Western blot analysis of PD-L1-Myc, PD-L1-Flag, PD-L1-GFP WT, extracellular domain (ECD), and intracellular domain (ICD) proteins in tunicamycin (TM) and/or MG132 treated cells. mRNA expressions are showed in bottom. (D) The intensity of glycosylated or non-glycosylated PD-L1 protein in (C) was quantified by a densitometer (bottom). (E) Protein stability of PD-L1 proteins in ngPD-L1 expressing BT549 cells. Cells were treated with 20 mM cycloheximide (CHX) at indicated intervals and analyzed in Western blot analysis. The intensity of PD-L1 protein was quantified by a densitometer (bottom). (F) PD-L1 and PD-1 binding analysis in vitro. Wild-type and GSK3 $\beta$  deficient mouse embryonic fibroblast (MEF) cells were transient transfected with Flag-tagged PD-L1. PD-L1 was immunoprecipitated and subject to in vitro binding with PD-1. (G) Western blot analysis of PD-L1 expression in MDA-MB-468 and MDA-MB-468-PD-L1 cells upon EGF or IFN $\gamma$  treatment. Cells were serum starved overnight prior to EGF or IFN $\gamma$  treatment for 6 h. qPCR analysis of PD-L1 is shown on the right. (H) Boxplot of EGFR expression in breast cancer subtypes using TCGA RNAseq\_V2 data, Student's t test was used to evaluate significant increases of EGFR expression in basal vs other subtypes (I) Box plot of B3GNT3 expression in breast cancer subtypes. (J) Co-immunoprecipitation of PD-L1 and B3GNT3. HEK 293 cells were transient transfected with Flag-B3GNT3 and/or PD-L1. Cell lysates were IP with Flag antibody and subsequently western blot with PD-L1. (K) PD-L1 and PD-1 binding in non-TNBC cell lines. MCF7 or T47D non-TNBC cells were transiently transfected with Flag-B3GNT3 and/or EGFR. Cell lysates were then subjected to IP with PD-L1 antibody followed by Western blotting with PD-1 antibody. (L) Kaplan-Meier overall survival curves of *B3GNT3* expression in breast or lung cancer TCGA dataset. \*p <0.05, \*\*p <0.001, statistically significant by Student's *t*-test. All error bars are expressed as mean  $\pm$  S.D. of 3 independent experiments.

**Table S1. Gene expression profile of N-linked glycotransferase, Related to Figure 3.**

| GeneCard ID | Gene name                                                                              | Symbol  | Expression in TNBC (medianFC) | Correlation with EGFR (PearsonR) |
|-------------|----------------------------------------------------------------------------------------|---------|-------------------------------|----------------------------------|
| GC22P039447 | Mannosyl (Beta-1,4-)-Glycoprotein Beta-1,4-N-Acetylglucosaminyltransferase             | MGAT3   | <b>3.08</b>                   | <b>0.5246</b>                    |
| GC19P017794 | UDP-GlcNAc:BetaGal Beta-1,3-N-Acetylglucosaminyltransferase 3                          | B3GNT3  | <b>6.22</b>                   | <b>0.4426</b>                    |
| GC12M101745 | N-Acetylglucosamine-1-Phosphate Transferase Alpha And Beta Subunits                    | GNPTAB  | 1.21                          | <b>0.436</b>                     |
| GC03P186930 | ST6 Beta-Galactoside Alpha-2,6-Sialyltransferase 1                                     | ST6GAL1 | <b>1.73</b>                   | <b>0.3848</b>                    |
| GC19M012649 | Mannosidase Alpha Class 2B Member 1                                                    | MAN2B1  | 1.4                           | <b>0.3673</b>                    |
| GC15P092393 | ST8 Alpha-N-Acetyl-Neuraminide Alpha-2,8-Sialyltransferase 2                           | ST8SIA2 | 0.87                          | 0.2992                           |
| GC02P128091 | UDP-Glucose Glycoprotein Glucosyltransferase 1                                         | UGGT1   | 1.09                          | 0.2794                           |
| GC05M100806 | ST8 Alpha-N-Acetyl-Neuraminide Alpha-2,8-Sialyltransferase 4                           | ST8SIA4 | 1.04                          | 0.2976                           |
| GC01P043978 | Beta-1,4-Galactosyltransferase 2                                                       | B4GALT2 | <b>1.68</b>                   | 0.2185                           |
| GC02P134119 | Mannosyl (Alpha-1,6-)-Glycoprotein Beta-1,6-N-Acetyl-Glucosaminyltransferase           | MGAT5   | 0.97                          | <b>0.3076</b>                    |
| GC02M074461 | Mannosyl-Oligosaccharide Glucosidase                                                   | MOGS    | <b>1.53</b>                   | 0.2073                           |
| GC05M180790 | Mannosyl (Alpha-1,3-)-Glycoprotein Beta-1,2-N-Acetylglucosaminyltransferase            | MGAT1   | 1.06                          | 0.272                            |
| GC17P076868 | Mannosyl (Alpha-1,6-)-Glycoprotein Beta-1,6-N-Acetyl-Glucosaminyltransferase           | MGAT5B  | 1.25                          | 0.2036                           |
| GC09M033100 | Beta-1,4-Galactosyltransferase 1                                                       | B4GALT1 | 1.05                          | 0.1495                           |
| GC02P062196 | UDP-GlcNAc:BetaGal Beta-1,3-N-Acetylglucosaminyltransferase 2                          | B3GNT2  | 1.04                          | 0.1342                           |
| GC01P117367 | Mannosidase Alpha Class 1A Member 2                                                    | MAN1A2  | 0.88                          | 0.207                            |
| GC10P073772 | Fucosyltransferase 11                                                                  | FUT11   | 0.8                           | 0.1359                           |
| GC01M161171 | Beta-1,4-Galactosyltransferase 3                                                       | B4GALT3 | 1.27                          | 0.0767                           |
| GC03M033013 | Galactosidase Beta 1                                                                   | GLB1    | 1.05                          | 0.1662                           |
| GC05M179797 | Mannosyl (Alpha-1,3-)-Glycoprotein Beta-1,4-N-Acetylglucosaminyltransferase            | MGAT4B  | 1.21                          | 0.1268                           |
| GC11M062756 | Glucosidase II Alpha Subunit                                                           | GANAB   | 1.09                          | 0.1623                           |
| GC19P011435 | Protein Kinase C Substrate 80K-H                                                       | PRKCSH  | 1.19                          | 0.0404                           |
| GC12M085955 | MGAT4 Family Member C                                                                  | MGAT4C  | 1                             | 0.1006                           |
| GC11P074988 | Neuraminidase 3                                                                        | NEU3    | 0.91                          | 0.1                              |
| GC02P241808 | Neuraminidase 4                                                                        | NEU4    | 0.6                           | 0.0417                           |
| GC06M119269 | Mannosidase Alpha Class 1A Member 1                                                    | MAN1A1  | 0.52                          | 0.0804                           |
| GC18P057350 | ST8 Alpha-N-Acetyl-Neuraminide Alpha-2,8-Sialyltransferase 3                           | ST8SIA3 | 1                             | 0.031                            |
| GC02P233032 | Neuraminidase 2                                                                        | NEU2    | 1                             | 0.0786                           |
| GC14P049620 | Mannosyl (Alpha-1,6-)-Glycoprotein Beta-1,2-N-Acetylglucosaminyltransferase            | MGAT2   | 0.89                          | -0.0099                          |
| GC13M095801 | UDP-Glucose Glycoprotein Glucosyltransferase 2                                         | UGGT2   | 0.92                          | 0.0018                           |
| GC20M035115 | ER Degradation Enhancing Alpha-Mannosidase Like Protein 2                              | EDEM2   | 1.19                          | -0.0351                          |
| GC15M072340 | Hexosaminidase Subunit Alpha                                                           | HEXA    | 0.99                          | 0.0416                           |
| GC06M143494 | Fucosidase, Alpha-L- 2                                                                 | FUCA2   | 1.09                          | -0.021                           |
| GC09P137086 | Mannosidase Alpha Class 1B Member 1                                                    | MAN1B1  | 0.96                          | -0.0188                          |
| GC15P090902 | Mannosidase Alpha Class 2A Member 2                                                    | MAN2A2  | 1.06                          | 0.072                            |
| GC10M017360 | ST8 Alpha-N-Acetyl-Neuraminide Alpha-2,8-Sialyltransferase 6                           | ST8SIA6 | 0.08                          | -0.0697                          |
| GC03P005203 | ER Degradation Enhancing Alpha-Mannosidase Like Protein 1                              | EDEM1   | 0.71                          | -0.0901                          |
| GC05P074640 | Hexosaminidase Subunit Beta                                                            | HEXB    | 0.85                          | -0.0348                          |
| GC04M102631 | Mannosidase Beta                                                                       | MANBA   | 0.85                          | -0.1086                          |
| GC16M005014 | N-Acetylglucosamine-1-Phosphodiester Alpha-N-Acetylglucosaminidase                     | NAGPA   | 1.04                          | -0.1493                          |
| GC04M177430 | Asparlyglucosaminidase                                                                 | AGA     | 0.75                          | -0.2059                          |
| GC02M098700 | Mannosyl (Alpha-1,3-)-Glycoprotein Beta-1,4-N-Acetylglucosaminyltransferase, Isozyme A | MGAT4A  | 0.59                          | -0.21                            |
| GC19M041425 | UDP-GlcNAc:BetaGal Beta-1,3-N-Acetylglucosaminyltransferase 8                          | B3GNT8  | 0.41                          | -0.1747                          |
| GC01M184659 | ER Degradation Enhancing Alpha-Mannosidase Like Protein 3                              | EDEM3   | 0.69                          | -0.1536                          |
| GC06M031857 | Neuraminidase 1                                                                        | NEU1    | 0.93                          | -0.248                           |
| GC01P025628 | Mannosidase Alpha Class 1C Member 1                                                    | MAN1C1  | 0.36                          | -0.1886                          |
| GC01M023845 | Fucosidase, Alpha-L- 1                                                                 | FUCA1   | 0.52                          | -0.2878                          |
| GC16P001351 | N-Acetylglucosamine-1-Phosphate Transferase Gamma Subunit                              | GNPTG   | 0.69                          | -0.3938                          |
| GC14P065411 | Fucosyltransferase 8                                                                   | FUT8    | 0.31                          | -0.3535                          |

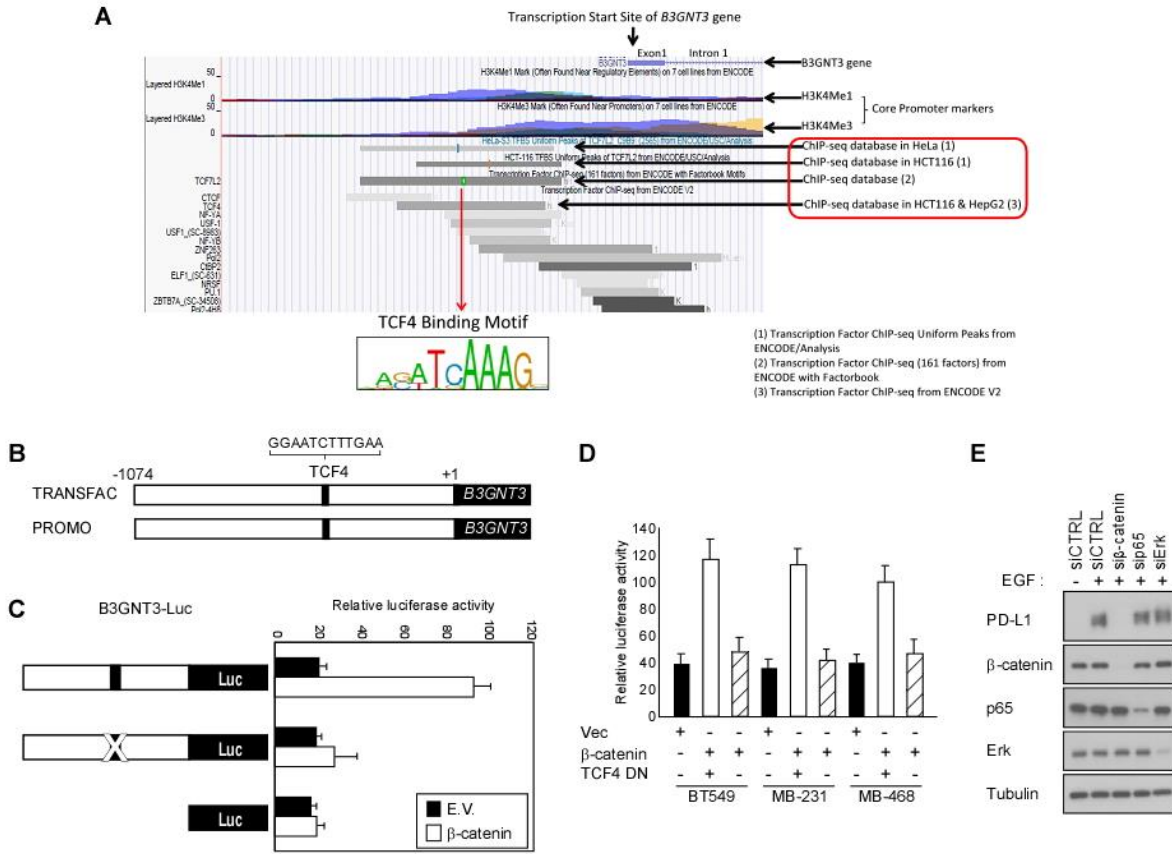

**Figure S4. EGF signaling upregulates glycosyltransferase *B3GNT3* via  $\beta$ -catenin pathway, Related to Figure 4. (A) ENCODE database analysis of TCF4 transcription factor on the *B3GNT3* promoter region using chromatin immunoprecipitation sequencing. (B) TCF4 binding motif analysis of the *B3GNT3* promoter using the TRANSFAC and PROMO databases. (C) *B3GNT3* promoter luciferase assay was performed by transient transfection in HEK293 cells. (D) *B3GNT3* promoter assay in presence of 10 ng/ml EGF,  $\beta$ -catenin and/or TCF4 DN (dominant negative TCF4). (E) Western blot analysis of glycosylated PD-L1 proteins in  $\beta$ -catenin, p65, or Erk knocking down cells with EGF treatment. Error bars represent mean  $\pm$  S.D. of 3 independent experiments.**



**Table S2. Analysis of lectin binding affinity to PD-L1 protein, Related to Figure 4.**

| Lectin<br>(FITC conjugated)                    | Abbreviation | PD-L1 binding |        |    | PD-L1<br>WT<br>specific<br>binding |
|------------------------------------------------|--------------|---------------|--------|----|------------------------------------|
|                                                |              | WT/M2         | 4NQ/M2 | M2 |                                    |
| Concanavain A                                  | Con A        | +             | +      | +  | -                                  |
| Peanut                                         | PNA          | -             | -      | -  | -                                  |
| <i>Dolichos biflorus</i>                       | DBA          | -             | -      | -  | -                                  |
| <i>Ricinus communis</i> I                      | RCA 120      | +             | +      | +  | -                                  |
| Soybean                                        | SBA          | -             | -      | -  | -                                  |
| Wheat Germ                                     | WGA          | +             | +      | +  | -                                  |
| <i>Ulex europaeus</i> I                        | UEA I        | -             | -      | -  | -                                  |
| <i>Griffonia simplicifolia</i> I               | GSL I        | +             | -      | -  | +                                  |
| <i>Phaseolus vulgaris</i><br>Erythroagglutinin | PHA-E        | +             | +      | +  | -                                  |
| <i>Lens culinaris</i>                          | LCA          | +             | +      | +  | -                                  |
| Succinylated Wheat<br>Germ                     | S-WGA        | +             | -      | -  | +                                  |
| <i>Pisum sativum</i>                           | PSA          | +             | +      | +  | -                                  |
| <i>Griffonia simplicifolia</i> II              | GSL II       | +             | -      | -  | +                                  |
| <i>Erythrina cristagalli</i>                   | ECL          | -             | -      | -  | -                                  |
| <i>Datura stramonium</i>                       | DSL          | +             | +      | +  | -                                  |
| Jacalin                                        | Jacalin      | +             | +      | +  | -                                  |
| <i>Lycopersicon esculentum</i>                 | LEL          | +             | -      | -  | +                                  |
| <i>Vicia villosa</i>                           | VVA          | +             | -      | -  | +                                  |
| <i>Solanum tuberosum</i>                       | STL          | +             | +      | +  | -                                  |

WT/M2, PD-L1 WT protein on M2 (anti-Flag) agarose; 4NQ/M2, PD-L1 4NQ protein on M2 (anti-Flag) agarose; M2, M2 (anti-Flag) agarose.

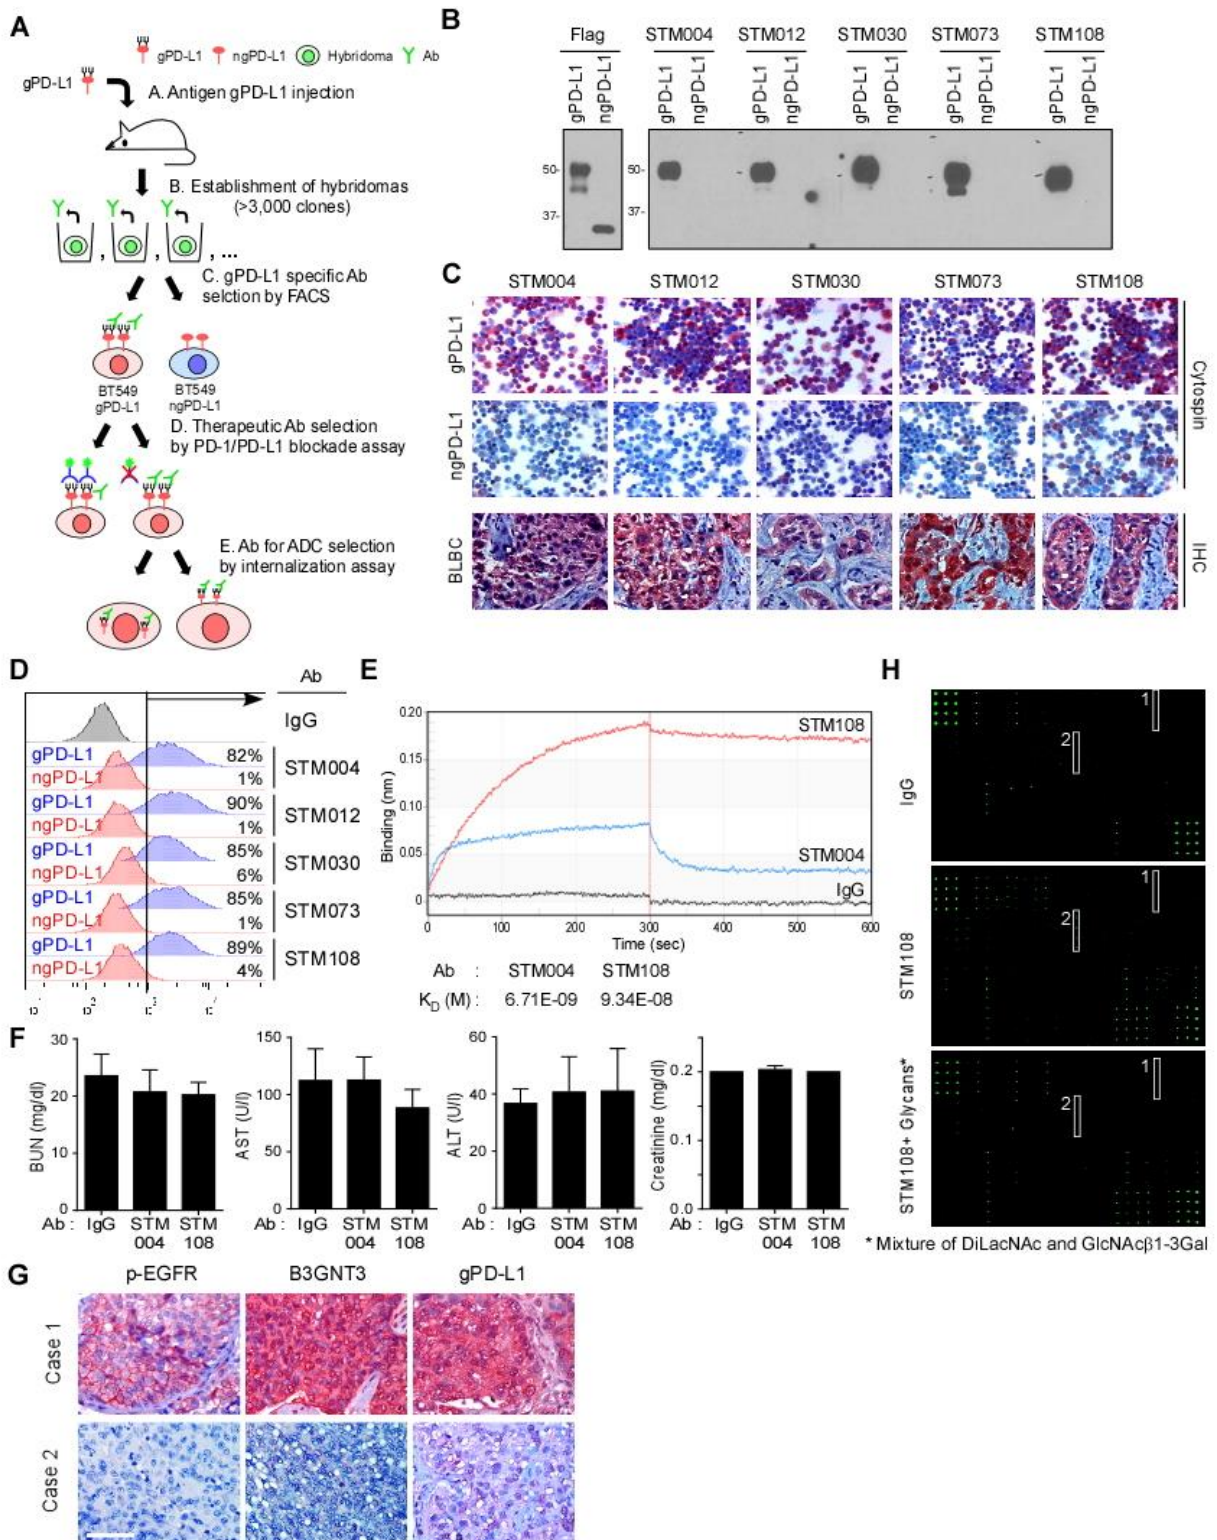

**Figure S5. Production and validation of glycosylated PD-L1 antibody, Related to Figure 5.**

(A) Working flow chart for production of glycosylated PD-L1 antibody. (B) Western blot analysis of PD-L1 by anti-Flag or glycosylated PD-L1 antibodies in gPD-L1 or ngPD-L1 expressing BT549 cell lysates. (C) Validation of glycosylated PD-L1 antibodies for cytospin staining or immunohistochemical staining of basal-like breast cancer (BLBC) tissues. (D) Flow cytometer analysis by glycosylated PD-L1 antibodies in gPD-L1 or ngPD-L1 expressing BT549 cells. IgG serves as a negative control. (E) Binding affinity ( $K_D$ ) analysis of glycosylated PD-L1 antibodies, STM004 and STM108 by Octet. (F) The effect of treatment on BALB/c mice. Mice liver, and kidney functions were measured at the end of the experiments. AST, aspartate aminotransferase; ALT, alanine aminotransferase; BUN, blood urea nitrogen. (G) IHC staining of human breast cancer patient samples of p-EGFR, B3GNT3 and gPD-L1. (H) Representative images for the Glycan Array. The Glycan Array 100 was probed with biotin-labeled STM108 antibody. STM108 binds to two glycans (1 and 2) and the bindings are compromised by mixture of B3GNT3 substrate or product, mixture of DiLacNAc and GlcNAc $\beta$ 1-3Gal. All error bars are expressed as mean  $\pm$  S.D. of 3 independent experiments.

**Table S3. Characterization of gPD-L1 antibodies, Related to Figure 5.**

|                                                 | STM004        | STM108               |
|-------------------------------------------------|---------------|----------------------|
| Recognizing glycosylation site                  | N35           | N192, N200           |
| PD-1/PD-L1 blockade activity (EC50, $\mu$ g/ml) | 0.138         | 0.036                |
| $K_D$ (affinity, M)                             | 9.34E-08      | 6.71E-09             |
| Internalization                                 | -             | +++                  |
| Enhancement of T cell killing activity          | ++            | +++                  |
| Epitope binding site of PD-L1                   | Y56, K62, K75 | S80, Y81, K162, S169 |

**Table S4. Relationship between gPD-L1, pEGFR (Y1068), and B3GNT3 expression in surgical specimens of breast cancer, Related to Figure 5.**

|        |         | Expression of gPD-L1 |               |                | p value    |
|--------|---------|----------------------|---------------|----------------|------------|
|        |         | - / +                | ++ /+++       | Total          |            |
| pEGFR  |         | 31                   | 33            | 64             | p = 0.027* |
|        | - / +   | (72.1%)<br>12        | (50.8%)<br>32 | (59.3%)<br>44  |            |
|        | ++ /+++ | (27.9%)<br>43        | (49.2%)<br>65 | (40.7%)<br>108 |            |
|        | Total   | (100%)               | (100%)        | (100%)         |            |
| B3GNT3 |         | 25                   | 32            | 57             | p = 0.002* |
|        | - / +   | (75.8%)<br>8         | (43.2%)<br>42 | (53.3%)<br>50  |            |
|        | ++ /+++ | (24.2%)<br>33        | (56.8%)<br>74 | (46.7%)<br>107 |            |
|        | Total   | (100%)               | (100%)        | (100%)         |            |

\*Correlations were analyzed using the PASS Pearson Chi-Square test. A p value < 0.05 was set as the criterion for statistical significance. A p value of < 0.05 was set as the criterion for statistical significance.

**Movie S1. An example STM108 trajectory measured on the membrane of a BT549 cell, Related to Figure 6.** A single labeled anti-gPD-L1 antibody was tracked for 400 sec. The movie playback rate is 50×. The cell size is approximately  $35\ \mu\text{m} \times 35\ \mu\text{m} \times 10\ \mu\text{m}$  (xyz). The cell membrane is plotted as a red iso-surface while the nucleus is a blue iso-surface. Trajectory is rainbow colored with magenta denoting the beginning.

**Movie S2. An example STM004 trajectory measured on the membrane of a BT549 cell, Related to Figure 6.** A single labeled anti-gPD-L1 antibody was tracked for 400 sec. The movie playback rate is 50×. The cell size is approximately  $22\ \mu\text{m} \times 22\ \mu\text{m} \times 10\ \mu\text{m}$  (xyz). The cell membrane is plotted as a red iso-surface while the nucleus is a blue iso-surface. Trajectory is rainbow colored with magenta denoting the beginning.

**A**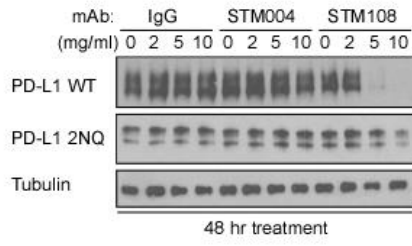**B**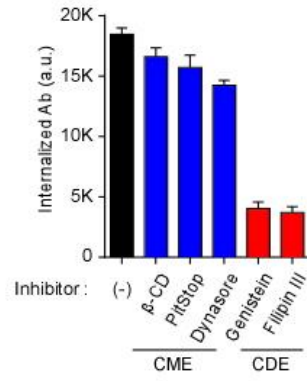**C**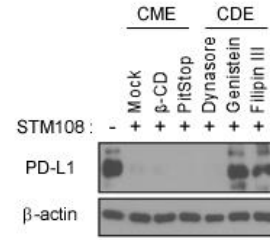**D**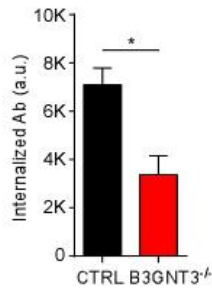**E**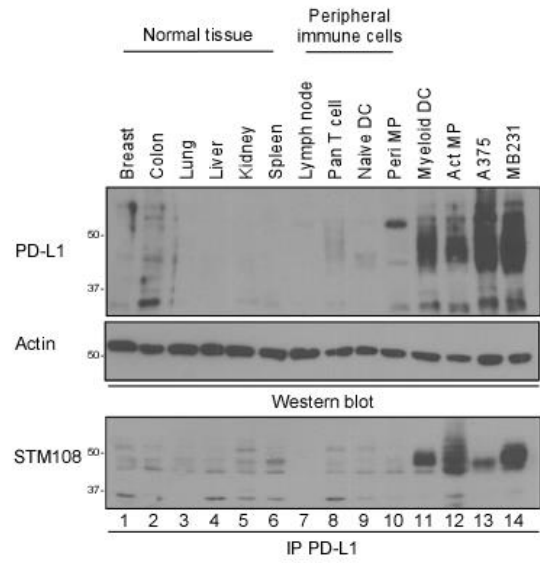

**Figure S6. gPD-L1 antibody STM108 induces internalization and degradation of PD-L1, Related to Figure 6.** (A) Western blot analysis of wild-type (WT) PD-L1 or 2NQ mutant PD-L1 after treatment with IgG, STM004, or STM108. (B) Internalization of STM108 in clathrin-mediated endocytosis (CME) or caveolae-dependent endocytosis (CDE) inhibitors treated cells. STM108 was labeled with pHrodo<sup>TM</sup> Red and then add to PD-L1 WT expressing MB231 cells. Internalized antibodies are quantified at 12 hours. (C) Western blot analysis of wild-type (WT) PD-L1 in STM108 and/or CME or CDE inhibitors treated PD-L1 WT expressing MB231 cells. (D) Internalization of STM108 in STM108 treated PD-L1 WT expressing control (CTRL) or B3GNT3 knockout (B3GNT3<sup>-/-</sup>) BT549 cells. (E) Western blot analysis of PD-L1 and STM108 in normal tissues, peripheral immune cells, and cancer cell lysates. Protein lysates (1  $\mu$ g) were separated on SDS-PAGE for Western blot analysis. Myeloid DC, myeloid dendritic cells. Act MP, tumor-associated macrophage. Arrowhead, non-glycosylated PD-L1. Closed circle, glycosylated PD-L1. Lower panel, PD-L1 was immunoprecipitated and then subjected to Western blotting using STM108. \*p <0.05, statistically significant by Student's *t*-test. All error bars are expressed as mean  $\pm$  S.D. of 3 independent experiments.

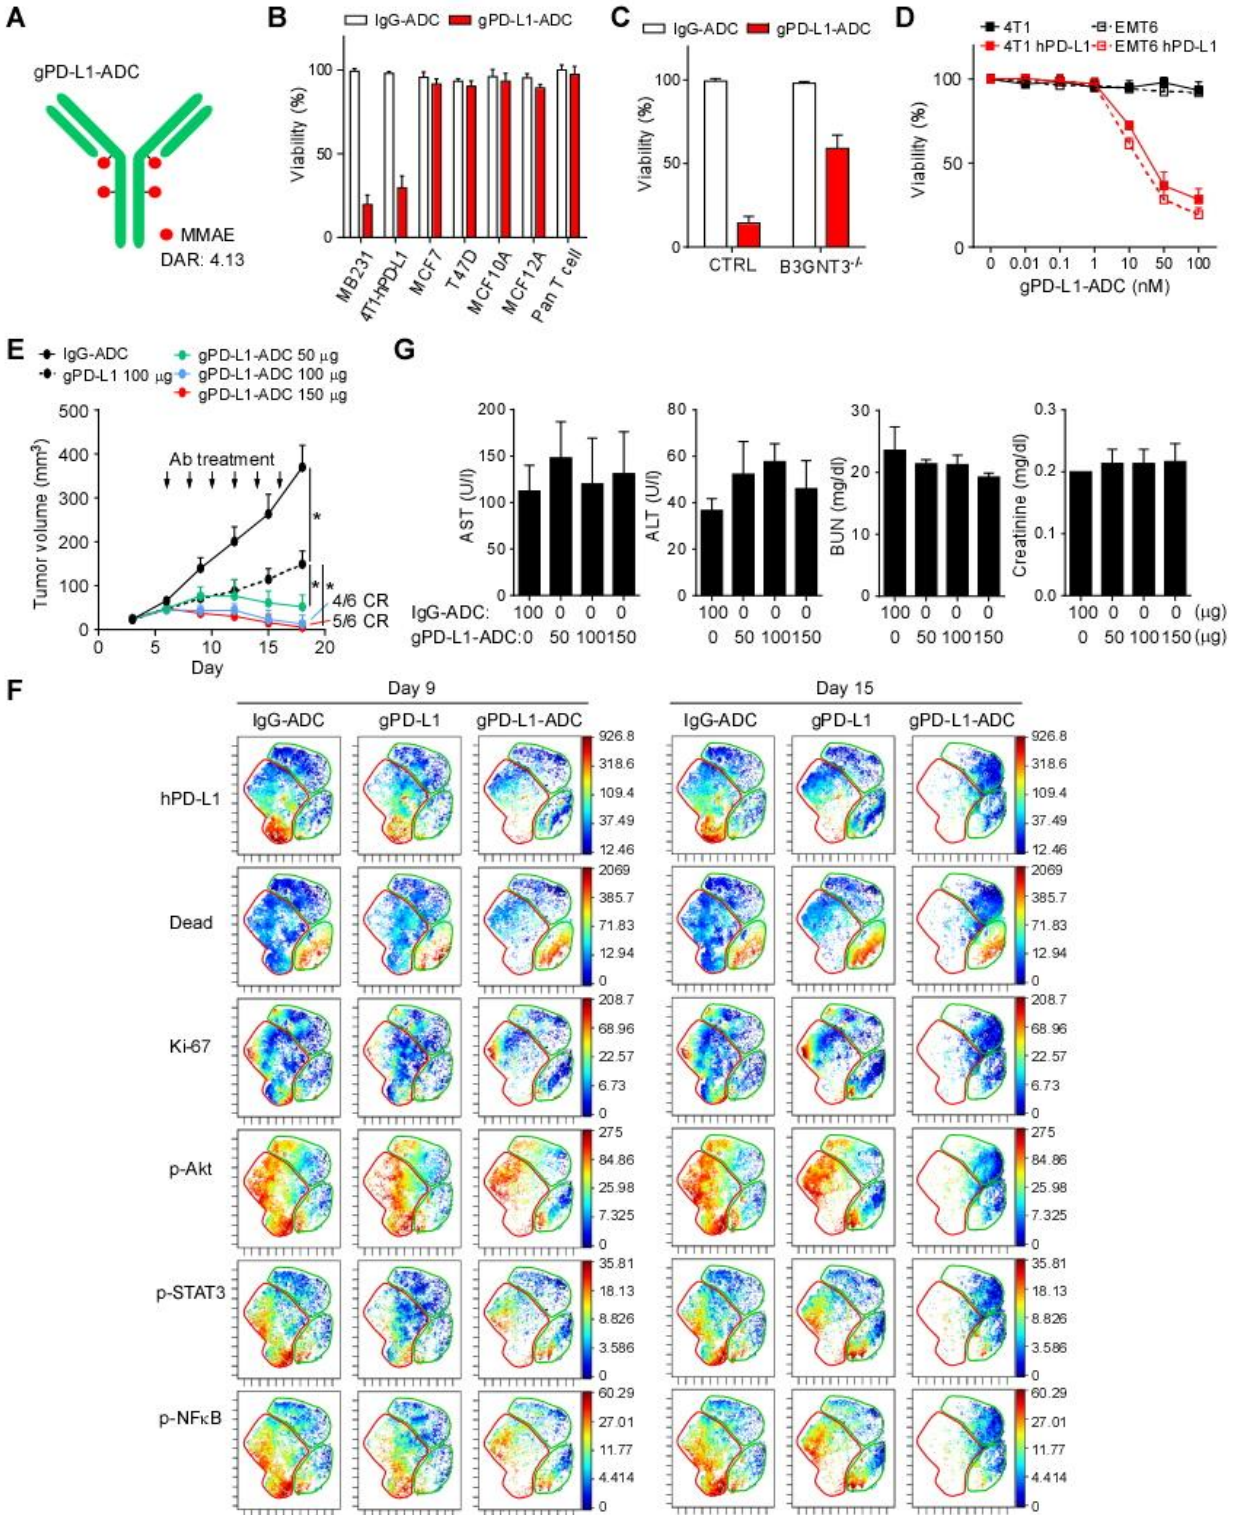



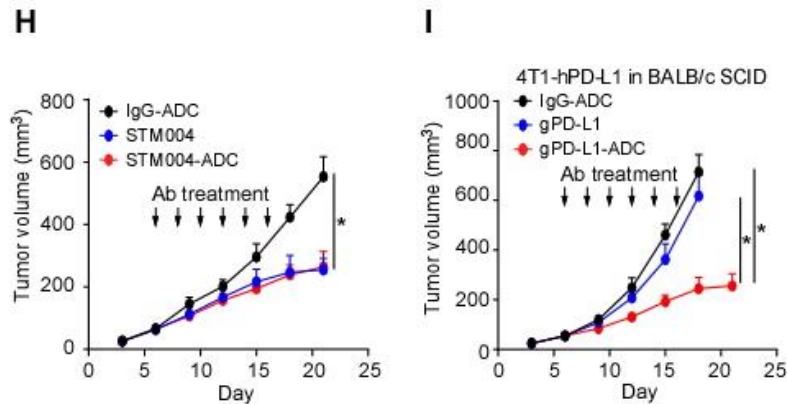

**Figure S7. gPD-L1 antibody-drug conjugate (gPD-L1-ADC) shows PD-L1/PD-1 blockade and cytotoxicity in 4T1-hPD-L1 syngeneic mouse model, Related to Figure 7.** (A) Schematic diagram of STM108 antibody-MMAE conjugate (gPD-L1-ADC). DAR, drug-to-antibody ratio. (B, C) Cell viability was measured after 50 nM gPD-L1-ADC treatment at 72 h. (D) Cytotoxic profile of gPD-L1-ADC in human PD-L1 (hPD-L1) expressing 4T1 or EMT6 cells. Cell viability were measured at 72 h. (E) The tumor growth of human PD-L1 expressing 4T1 (4T1-hPD-L1) cells in IgG-ADC, gPD-L1 (STM108), or gPD-L1-ADC antibody treated BALB/c mice. Tumors were measured at the indicated time points and dissected at endpoint.  $n = 7$  mice per group. Antibodies was injected intraperitoneally on days 6, 8, 10, 12, 14, and 16 after 4T1-hPD-L1 cells inoculation. CR, complete regression. (F) viSNE map derived from CyTOF (7-marker) analysis of 4T1-hPD-L1 tumors at day 9 and 15. Tumor cell populations were identified as hPD-L1 marker. Cells in the map are colored by the intensity of expression of the indicated markers. (G) The effect of treatment on BALB/c mice. Mice liver, and kidney functions were measured at the end of the experiments. AST, aspartate aminotransferase; ALT, alanine aminotransferase; BUN, blood urea nitrogen. (H) The tumor growth of 4T1-hPD-L1 cells in IgG-ADC, STM004, or STM004-ADC antibody treated BALB/c mice. Tumors were measured at the indicated time points and dissected at endpoint.  $n = 7$  mice per group. Arrow, antibody (Ab) treatment. (I) The tumor growth of 4T1-hPD-L1 cells in IgG-ADC, gPD-L1 (STM108), or gPD-L1-ADC antibody treated BALB/c SCID mice. Tumors were measured at the indicated time points and dissected at endpoint.  $n = 7$  mice per group. Arrow, antibody (Ab) treatment. \* $p < 0.05$ , statistically significant by Student's  $t$ -test. All error bars are expressed as mean  $\pm$  S.D. of 3 independent experiments.

**Table S5. Antibodies used for Cy-TOF analysis, Related to Figure 7.**

| <b>Marker</b>   | <b>Clone</b> | <b>Label</b> |
|-----------------|--------------|--------------|
| hPD-L1          | E1L3N        | 164Dy        |
| gPD-L1          | STM108       | 155Gd        |
| p-NF $\kappa$ B | 93H1         | 149Sm        |
| p-STAT3         | M9C6         | 152Sm        |
| p-AKT           | M89-61       | 159Tb        |
| Ki67            | Ki67         | 168Er        |
| EpCam           | G8.8         | 166Er        |
| Cisplatin       |              | 195Pt        |
